# Supplementary material for: Heteroatom tri-doped porous carbon derived from waste biomass as Pt-free counter electrode in dye-sensitized solar cells
Source: RSC Adv. 2018 May 21;8(33):18427–33. doi: 10.1039/c8ra02575d (PMC9080547; doi:10.1039/c8ra02575d)
Supplement: RA-008-C8RA02575D-s001 [file RA-008-C8RA02575D-s001.pdf]

**Electronic supplementary information (ESI)**

**Heteroatom Tri-doped Porous Carbon Derived from  
Waste Biomass as Pt-free Counter Electrode in Dye-  
sensitized Solar Cell**

Pin Ma <sup>b,e,‡</sup>, Wenli Lu <sup>a,‡</sup>, Xiaoying Yan <sup>c,‡</sup>, Weidan Li <sup>a</sup>, Yanyan Fang <sup>b</sup>,

Xiong Yin <sup>a,\*</sup>, Zhengang Liu <sup>d,\*</sup>, Yuan Lin <sup>b,\*</sup>

<sup>a</sup> State Key Laboratory of Chemical Resource Engineering, School of Science, Beijing  
University of Chemical Technology, Beijing 100029, P. R. China

<sup>b</sup> Beijing National laboratory for Molecular Sciences, Key Laboratory of  
Photochemistry, CAS Research/Education Center for Excellence in Molecular  
Sciences, Institute of Chemistry, Chinese Academy of Sciences, Beijing 100190, P. R.  
China

<sup>c</sup> CAS Key Laboratory of Standardization and Measurement for Nanotechnology,  
National Center for Nanoscience and Technology, Beijing 100190, P. R. China

<sup>d</sup> Laboratory of Solid Waste Treatment and Recycling, Research Center for Eco-  
Environmental Sciences, Chinese Academy of Sciences, Beijing 100085, P. R. China

<sup>e</sup> University of Chinese Academy of Sciences, Beijing 100049, P. R. China

---

<sup>‡</sup> These authors contributed equally to this work.

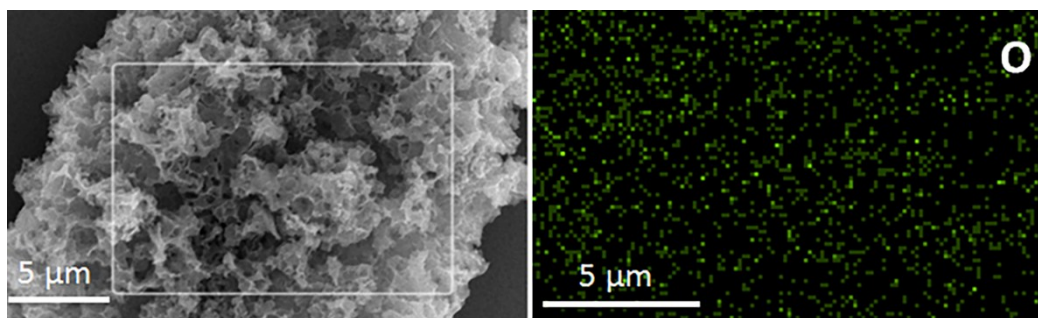

**Figure S1.** SEM image (a) and elemental mapping image (b) of O element for as-obtained porous carbon sample.

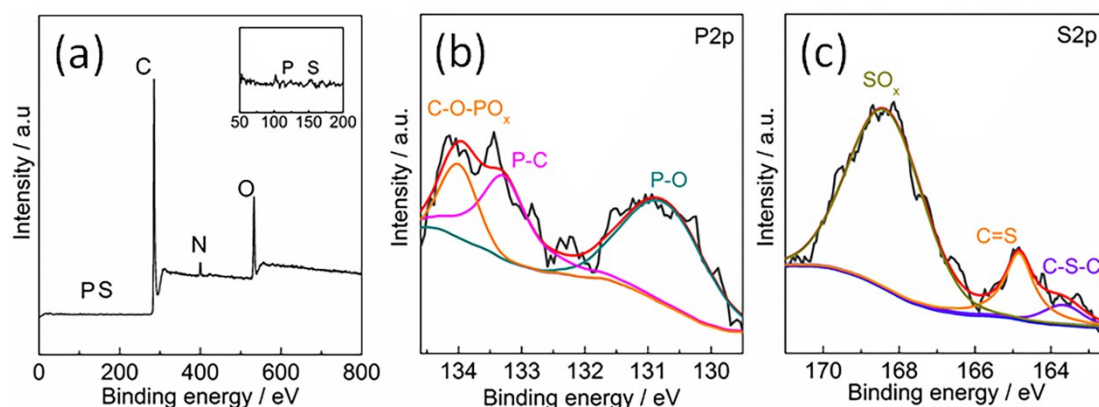

**Figure S2.** (a) The XPS survey spectra of as-obtained porous carbon sample with high resolution XPS spectra of (b) P 2p and (c) S2p element.

As shown in Figure S2b, there are four characteristic peaks in the P 2p spectra, located at 130.8, 133.2, 133.9 and 136.0 eV. And these peaks are ascribed to formation of P-O, P-C, and C-O-PO<sub>x</sub>. Figure S2c exhibits the S 2p spectra, associated with three peaks at 163.7 eV (C-S-C), 164.8 eV (C=S) and 168.4 eV (C-SO<sub>x</sub>-C), respectively. It verified that the P and S elements were successfully doped into the porous carbon.

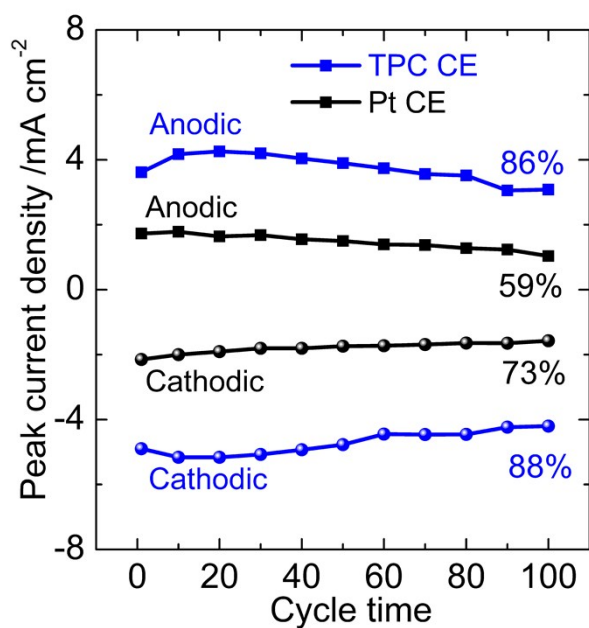

**Figure S3.** The changes in cathodic and anodic peak current densities of redox couple ( $I_3^-/I^-$ ) on the TPC and Pt electrode in CV measurement during the 100 scanning cycles.

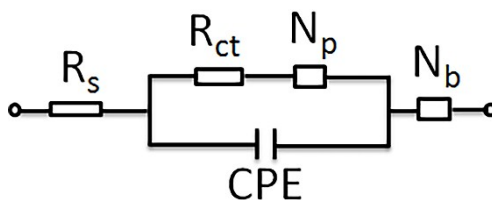

**Scheme S1.** The equivalent circuit for fitting experimental data in Figure 5b.  $R_s$ : Series resistance;  $R_{ct}$ : charge transfer resistance; CPE: double-layer capacitance;  $N_p$ : Nernst diffusion impedance within the electrode pores;  $N_b$ : bulk Nernst diffusion impedance in the electrolyte.

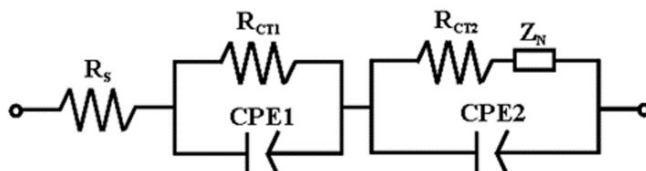

**Scheme S2.** The equivalent circuit for fitting data in Figure 6b.  $R_{ct1}$ : the charge-transfer resistance at the interface of the counter electrode and the liquid electrolyte;  $R_{ct2}$ : charge transfer resistance at the  $TiO_2$ /dye/electrolyte interfaces;  $Z_N$ : Nernst diffusion resistance of the redox couple within the electrolyte; CPE1 and CPE2: double-layer capacitances.
